# Supplementary material
Source: PubMed Central journal article supplement (PMC4666778)
Supplement: NIHMS727860-supplement-2.pdf [file NIHMS727860-supplement-2.pdf]

**Supplementary Table 1.** Panel of HS2 sgRNA protospacer target sequences.

| <b>Cr#</b> | <b>Protospacer</b>    | <b>PAM</b> | <b>Strand</b> |
|------------|-----------------------|------------|---------------|
| 1          | gagacacacagaaatgtaac  | AGG        | +             |
| 2          | ggactatgggaggtcactaa  | TGG        | +             |
| 3          | ggtggggcactgacccccgac | AGG        | -             |
| 4          | gaaggttacacagaaccaga  | AGG        | +             |
| 5          | ctagagtgatgactcctatc  | TGG        | -             |
| 6          | gactaaaactccacctcaaa  | CGG        | -             |
| 7          | gccctgtaagcatcctgctg  | GGG        | +             |
| 8          | gctcatgcttgactatggg   | AGG        | +             |
| 9          | gttctggccaggcccctgtc  | GGG        | -             |
| 10         | aatatgtcacattctgtctc  | AGG        | +             |
| 11         | agtgccccacccccgccttc  | TGG        | +             |
| 12         | gtggggcactgacccccgaca | GGG        | +             |
| 13         | aaccttctaagcaaaccttc  | TGG        | -             |
| 14         | gttacacagaaccagaaggc  | GGG        | +             |
| 15         | agtcatgatgagtcatgctg  | AGG        | -             |
| 16         | gatgagtcatgctgaggctt  | AGG        | -             |
| 17         | actctaggctgagaacatct  | GGG        | +             |
| 18         | gtccccagcaggatgcttac  | AGG        | -             |
| 19         | cagggcagatggcaaaaaaa  | AGG        | -             |
| 20         | gaggtggagtttagtcagg   | TGG        | +             |
| 21         | aaacggcatcataaagaaaa  | TGG        | -             |

**Supplementary Table 2.** Significant genomic windows for RNA-seq of dCas9-KRAB + Cr4 compared to un-transduced (No LV) control cells.

| <b>id</b>    | <b>Gene</b>                                                                    | <b>foldChange</b> | <b>log2FoldChange</b> | <b>pval</b> | <b>padj</b> |
|--------------|--------------------------------------------------------------------------------|-------------------|-----------------------|-------------|-------------|
| NM_005330    | <b><i>HBE1</i></b>                                                             | 0.09              | -3.51                 | 4.32E-41    | 1.76E-36    |
| NM_000184    | <b><i>HBG2</i></b>                                                             | 0.25              | -2.03                 | 1.20E-16    | 2.43E-12    |
| NM_000559    | <b><i>HBG1</i></b>                                                             | 0.29              | -1.81                 | 9.57E-14    | 1.30E-09    |
| NM_013271    | <b><i>proprotein convertase subtilisin/kexin type 1 inhibitor (PCSK1N)</i></b> | 22.17             | 4.47                  | 3.81E-12    | 3.88E-08    |
| NM_006169    | <b><i>NNMT (methyltransferase)</i></b>                                         | 0.23              | -2.15                 | 1.01E-11    | 8.19E-08    |
| NM_002166    | <b><i>inhibitor of DNA binding 2 (ID2)</i></b>                                 | 0.30              | -1.75                 | 4.28E-09    | 2.90E-05    |
| NM_002167    | <b><i>inhibitor of DNA binding 3 (ID3)</i></b>                                 | 0.26              | -1.96                 | 5.29E-09    | 3.08E-05    |
| NM_001099456 | <b><i>neuropeptide W (NPW)</i></b>                                             | 4.57              | 2.19                  | 1.59E-08    | 8.11E-05    |
| NM_138618    | <b><i>Rh blood group, CcEe antigens (RHCE)</i></b>                             | 0.38              | -1.39                 | 1.81E-06    | 0.00817     |
| NM_020485    | <b><i>Rh blood group, CcEe antigens (RHCE)</i></b>                             | 0.40              | -1.32                 | 2.14E-06    | 0.00872     |
| NM_015150    | <b><i>raftlin, lipid raft linker 1 (RFTN1)</i></b>                             | 7.79              | 2.96                  | 2.63E-06    | 0.00974     |

**Supplementary Table 3.** Significant genomic windows for RNA-seq of dCas9-KRAB + Cr10 compared to un-transduced (No LV) control cells.

| <b>id</b>    | <b>Gene</b>                                                                         | <b>foldChange</b> | <b>log2FoldChange</b> | <b>pval</b> | <b>padj</b> |
|--------------|-------------------------------------------------------------------------------------|-------------------|-----------------------|-------------|-------------|
| NM_005330    | <b>HBE1</b>                                                                         | 0.13              | -2.97                 | 2.70E-31    | 1.10E-26    |
| NM_013271    | <b>proprotein convertase subtilisin/kexin type 1 inhibitor (PCSK1N)</b>             | 24.00             | 4.58                  | 1.11E-12    | 2.26E-08    |
| NM_006169    | <b>NNMT (methyltransferase)</b>                                                     | 0.26              | -1.96                 | 2.61E-10    | 3.54E-06    |
| NM_002167    | <b>inhibitor of DNA binding 3, dominant negative helix-loop-helix protein (ID3)</b> | 0.26              | -1.95                 | 5.83E-09    | 4.75E-05    |
| NM_000184    | <b>HBG2</b>                                                                         | 0.38              | -1.40                 | 5.84E-09    | 4.75E-05    |
| NM_001099456 | <b>neuropeptide W (NPW)</b>                                                         | 4.69              | 2.23                  | 1.04E-08    | 7.08E-05    |
| NM_000559    | <b>HBG1</b>                                                                         | 0.42              | -1.26                 | 1.56E-07    | 0.00091     |
| NR_027349    | <b>miR-17-92 cluster host gene (MIR17HG)</b>                                        | 3.82              | 1.94                  | 2.35E-07    | 0.0012      |
| NM_001124758 | <b>spinster homolog 2 (Drosophila) (SPNS2)</b>                                      | 2.61              | 1.39                  | 4.25E-07    | 0.00192     |
| NR_027350    | <b>miR-17-92 cluster host gene (MIR17HG)</b>                                        | 2.43              | 1.28                  | 6.07E-07    | 0.00247     |
| NM_005354    | <b>jun D proto-oncogene (JUND)</b>                                                  | 2.25              | 1.17                  | 1.70E-06    | 0.0063      |
| NM_078467    | <b>cyclin-dependent kinase inhibitor 1A (p21, Cip1) (CDKN1A)</b>                    | 0.37              | -1.43                 | 2.12E-06    | 0.00721     |
| NM_000927    | <b>ATP-binding cassette, sub-family B (MDR/TAP)</b>                                 | 0.23              | -2.11                 | 2.78E-06    | 0.0087      |

**Supplementary Table 4.** Significant genomic windows for RNA-seq of dCas9 + Cr4 compared to un-transduced (No LV) control cells.

| <b>id</b>    | <b>Gene</b>                                                                         | <b>foldChange</b> | <b>log2FoldChange</b> | <b>pval</b> | <b>padj</b> |
|--------------|-------------------------------------------------------------------------------------|-------------------|-----------------------|-------------|-------------|
| NM_006169    | <i>NNMT (methyltransferase)</i>                                                     | 0.249052867       | -2.00548              | 9.26E-11    | 3.77E-06    |
| NM_005354    | <i>jun D proto-oncogene (JUND)</i>                                                  | 2.615147754       | 1.386892              | 1.37E-08    | 0.000279    |
| NM_002167    | <i>inhibitor of DNA binding 3, dominant negative helix-loop-helix protein (ID3)</i> | 0.288029008       | -1.79571              | 6.94E-08    | 0.000799    |
| NM_001099456 | <i>neuropeptide W (NPW)</i>                                                         | 4.209558093       | 2.073669              | 7.85E-08    | 0.000799    |
| NM_001124758 | <i>spinster homolog 2 (Drosophila) (SPNS2)</i>                                      | 2.687743739       | 1.426396              | 1.85E-07    | 0.001504    |
| NM_003378    | <i>VGF nerve growth factor inducible (VGF)</i>                                      | 3.470490126       | 1.795139              | 3.21E-07    | 0.002177    |
| NM_000479    | <i>anti-Mullerian hormone (AMH)</i>                                                 | 3.748840994       | 1.906445              | 1.23E-06    | 0.006271    |
| NM_206833    | <i>cortexin 1 (CTXN1)</i>                                                           | 2.313638379       | 1.210163              | 1.16E-06    | 0.006271    |

**Supplementary Table 5.** Significant genomic windows for RNA-seq of dCas9 + Cr10 compared to untransduced (No LV) control cells.

| <b>id</b>    | <b>Gene</b>                                                                         | <b>foldChange</b> | <b>log2FoldChange</b> | <b>pval</b> | <b>padj</b> |
|--------------|-------------------------------------------------------------------------------------|-------------------|-----------------------|-------------|-------------|
| NM_002167    | <i>inhibitor of DNA binding 3, dominant negative helix-loop-helix protein (ID3)</i> | 0.2144            | -2.221                | 3.97E-11    | 1.62E-06    |
| NM_006169    | <i>NNMT (methyltransferase)</i>                                                     | 0.3079            | -1.700                | 2.82E-08    | 0.0005745   |
| NR_027349    | <i>miR-17-92 cluster host gene (MIR17HG)</i>                                        | 4.0907            | 2.032                 | 4.76E-08    | 0.0006454   |
| NM_017521    | <i>FEV (ETS oncogene family) (FEV)</i>                                              | 3.4844            | 1.801                 | 5.32E-07    | 0.005417    |
| NM_005354    | <i>jun D proto-oncogene (JUND)</i>                                                  | 2.2737            | 1.185                 | 8.84E-07    | 0.007197    |
| NM_001099456 | <i>neuropeptide W (NPW)</i>                                                         | 3.6778            | 1.879                 | 1.44E-06    | 0.009782    |

**Supplementary Table 6.** Significant genomic windows for RNA-seq of dCas9-KRAB compared to untransduced (No LV) control cells.

| id           | Gene                                                                                | foldChange  | log2FoldChange | pval     | padj     |
|--------------|-------------------------------------------------------------------------------------|-------------|----------------|----------|----------|
| NM_006169    | <i>NNMT (methyltransferase)</i>                                                     | 0.223744062 | -2.1600787     | 5.85E-12 | 2.38E-07 |
| NM_002167    | <i>inhibitor of DNA binding 3, dominant negative helix-loop-helix protein (ID3)</i> | 0.229528919 | -2.123252163   | 2.86E-10 | 5.82E-06 |
| NM_001099456 | <i>neuropeptide W (NPW)</i>                                                         | 5.214784095 | 2.382607523    | 7.70E-10 | 1.04E-05 |
| NM_000032    | <i>5'-aminolevulinic acid synthase 2 (ALAS2)</i>                                    | 0.353630952 | -1.499683543   | 8.85E-09 | 9.01E-05 |
| NM_024807    | <i>triggering receptor expressed on myeloid cells-like 2 (TREM2)</i>                | 0.317645973 | -1.654508363   | 1.60E-08 | 0.000108 |
| NM_001037968 | <i>5'-aminolevulinic acid synthase 2 (ALAS2)</i>                                    | 0.356363009 | -1.488580505   | 1.45E-08 | 0.000108 |
| NM_020485    | <i>Rh blood group, CcEe antigens (RHCE)</i>                                         | 0.335709582 | -1.574714381   | 1.99E-08 | 0.000115 |
| NR_027349    | <i>miR-17-92 cluster host gene (MIR17HG)</i>                                        | 4.20562831  | 2.072321352    | 2.87E-08 | 0.000146 |
| NM_001037967 | <i>5'-aminolevulinic acid synthase 2 (ALAS2)</i>                                    | 0.364621296 | -1.455529269   | 3.36E-08 | 0.000152 |
| NM_001114138 | <i>dematin actin binding protein (DMTN)</i>                                         | 0.341936239 | -1.548200763   | 4.82E-08 | 0.000196 |
| NM_005354    | <i>jun D proto-oncogene (JUND)</i>                                                  | 2.458625102 | 1.297851766    | 1.04E-07 | 0.000383 |
| NM_001018007 | <i>tropomyosin 1 (alpha) (TPM1)</i>                                                 | 0.371349353 | -1.429151031   | 5.05E-07 | 0.001714 |
| NM_004163    | <i>RAB27B, member RAS oncogene family (RAB27B)</i>                                  | 0.350906617 | -1.510840942   | 6.08E-07 | 0.001904 |
| NM_001114137 | <i>dematin actin binding protein (DMTN)</i>                                         | 0.36437456  | -1.456505859   | 7.69E-07 | 0.002237 |
| NM_001124758 | <i>spinster homolog 2 (Drosophila) (SPNS2)</i>                                      | 2.545444408 | 1.347917558    | 8.80E-07 | 0.002389 |
| NM_013271    | <i>proprotein convertase subtilisin/kexin type 1 inhibitor (PCSK1N)</i>             | 9.346196033 | 3.224379298    | 1.11E-06 | 0.002816 |
| NM_001978    | <i>dematin actin binding protein (DMTN)</i>                                         | 0.407601694 | -1.294768049   | 1.86E-06 | 0.004452 |
| NM_001256008 | <i>patatin-like phospholipase domain containing 8 (PNPLA8)</i>                      | 0.401853137 | -1.315259749   | 1.99E-06 | 0.004507 |
| NM_002166    | <i>NA binding 2, dominant negative helix-loop-helix protein (ID2)</i>               | 0.385590691 | -1.374857871   | 2.56E-06 | 0.004998 |
| NM_001114135 | <i>dematin actin binding protein (DMTN)</i>                                         | 0.410773745 | -1.28358412    | 2.58E-06 | 0.004998 |
| NM_001114136 | <i>dematin actin binding protein (DMTN)</i>                                         | 0.412356004 | -1.278037682   | 2.52E-06 | 0.004998 |
| NM_003378    | <i>VEGF nerve growth factor inducible (VEGFI)</i>                                   | 3.145288414 | 1.653192314    | 3.11E-06 | 0.005497 |
| NM_006848    | <i>coiled-coil domain containing 85B (CCDC85B)</i>                                  | 2.347641144 | 1.231211898    | 3.02E-06 | 0.005497 |
| NM_213652    | <i>hemochromatosis type 2 (juvenile) (HFE2)</i>                                     | 0.302825541 | -1.723441206   | 3.38E-06 | 0.005741 |
| NM_016124    | <i>Rh blood group, D antigen (RHD)</i>                                              | 0.429779759 | -1.218330557   | 3.66E-06 | 0.005966 |
| NM_001114139 | <i>dematin actin binding protein (DMTN)</i>                                         | 0.412855951 | -1.276289595   | 4.20E-06 | 0.006483 |
| NM_138618    | <i>Rh blood group, CcEe antigens (RHCE)</i>                                         | 0.398450828 | -1.327526399   | 4.30E-06 | 0.006483 |
| NM_002587    | <i>protocadherin 1 (PCDH1)</i>                                                      | 0.39896065  | -1.325681635   | 5.81E-06 | 0.008445 |
| NM_001184797 | <i>trimethyllysine hydroxylase, epsilon (TMLHE)</i>                                 | 0.414557265 | -1.270356692   | 6.58E-06 | 0.009233 |

**Supplementary Table 7.** Significant genomic windows for anti-FLAG ChIP-seq of dCas9-KRAB + Cr4 compared to with dCas9-KRAB with no sgRNA. Cr4 protospacer sequence is located at chr11:5302033-5302052. \* indicates that genomic window contains the full Cr4 target sequence.

| Location                 | log <sub>2</sub> (Fold Change) | p-value  | FDR      | Contains Seed Sequence: 5' CCAGANGG 3' | Located within gene? | Gene        |
|--------------------------|--------------------------------|----------|----------|----------------------------------------|----------------------|-------------|
| chr11: 5301749-5302337*  | 2.81                           | 2.94E-24 | 9.22E-20 | Yes                                    | No                   | -           |
| chr19: 50163899-50164161 | 1.54                           | 5.01E-06 | .0785    | Yes                                    | Yes                  | <i>IRF3</i> |

**Supplementary Table 8.** Significant genomic windows for anti-FLAG ChIP-seq of dCas9-KRAB + Cr10 compared to dCas9-KRAB with no sgRNA. Cr10 protospacer sequence is located at chr11: 5301800-5301819. \* indicates that genomic window contains the full Cr10 target sequence.

| Location                | log <sub>2</sub> (Fold Change) | p-value  | FDR      | Contains Seed Sequence: 5' GTCTCNGG 3' | Located within gene? | Gene |
|-------------------------|--------------------------------|----------|----------|----------------------------------------|----------------------|------|
| chr11: 5301749-5302337* | 1.79                           | 1.23E-10 | 3.86E-06 | Yes                                    | No                   | -    |



**Supplementary Table 9.** Significant genomic windows for anti-FLAG ChIP-seq of dCas9-KRAB + Cr4 compared to dCas9 + Cr4. Cr4 protospacer sequence is located at chr11:5302033-5302052.

| Location              | log <sub>2</sub> (Fold Change) | p-value  | FDR      | Contains seed sequence:<br>5' CCAGANGG 3' | Located within gene? | Gene |
|-----------------------|--------------------------------|----------|----------|-------------------------------------------|----------------------|------|
| chr2: 3005381-3005638 | -1.89                          | 1.32E-08 | 4.14E-04 | Yes                                       | No                   | -    |

**Supplementary Table 10.** Significant genomic windows for H3K9 tri-methylation ChIP-seq of dCas9-KRAB + Cr4 compared to dCas9-KRAB without sgRNA. Cr4 protospacer sequence is located at chr11:5302033-5302052. \* indicates that genomic window contains the full Cr4 target sequence.

| Location                   | log <sub>2</sub> (Fold Change) | p-value  | FDR      | Contains Seed Sequence: 5' CCAGANGG 3' | Located within gene? | Gene           |
|----------------------------|--------------------------------|----------|----------|----------------------------------------|----------------------|----------------|
| chr11: 5299712-5300301     | 2.34                           | 2.57E-27 | 1.62E-21 | No                                     | No                   | -              |
| chr11: 5301862-5302715*    | 2.55                           | 2.01E-26 | 6.30E-21 | Yes                                    | No                   | -              |
| chr10: 104593626-104593861 | 1.89                           | 9.70E-15 | 2.03E-09 | No                                     | Yes                  | <i>CYP17A1</i> |
| chr1: 212292343-212293213  | 1.69                           | 1.60E-12 | 2.51E-07 | Yes                                    | No                   | -              |
| chr19: 50162440-50164657   | 1.17                           | 2.92E-12 | 3.67E-07 | Yes                                    | Yes                  | <i>IRF3</i>    |
| chr11: 5305857-5306185     | 1.62                           | 2.56E-11 | 2.68E-06 | Yes                                    | No                   | -              |
| chr11: 5304696-5305089     | 1.46                           | 1.64E-09 | 0.000148 | No                                     | No                   | -              |
| chr15: 63335520-63336583   | 1.22                           | 3.28E-09 | 0.000258 | Yes                                    | Yes                  | <i>TPM1</i>    |
| chrX: 71498037-71498803    | 1.35                           | 1.75E-08 | 0.001219 | Yes                                    | No                   | -              |
| chr6: 3090860-3094479      | -0.74                          | 1.22E-07 | 0.007662 | No                                     | Yes                  | <i>RIPK1</i>   |
| chr8: 15483400-15485560    | -0.83                          | 1.78E-07 | 0.010144 | Yes                                    | Yes                  | <i>TUSC3</i>   |
| chr16: 71971752-71973376   | -0.80                          | 1.96E-07 | 0.010284 | No                                     | Yes                  | <i>PKD1L3</i>  |
| chr14: 73674302-73676117   | -0.87                          | 2.68E-07 | 0.012955 | Yes                                    | Yes                  | <i>PSEN1</i>   |
| chr11: 76688558-76690234   | -0.84                          | 9.25E-07 | 0.04151  | Yes                                    | Yes                  | <i>ACER3</i>   |
| chr8: 10872937-10874459    | 0.92                           | 1.08E-06 | 0.04525  | Yes                                    | Yes                  | <i>XKR6</i>    |

**Supplementary Table 11.** Top significant genomic windows for H3K9 tri-methylation ChIP-seq of dCas9-KRAB + Cr10 compared to dCas9-KRAB without sgRNA. Cr10 protospacer sequence is located at chr11:5301800-5301819.

| Location                         | log <sub>2</sub> (Fold Change) | p-value  | FDR      | Contains Seed Sequence: 5' GTCTCNGG 3' | Located within gene? | Gene           |
|----------------------------------|--------------------------------|----------|----------|----------------------------------------|----------------------|----------------|
| <b>chr11:5299712-5300301</b>     | 2.52                           | 2.00E-32 | 1.26E-26 | No                                     | No                   | -              |
| <b>chr11:5301862-5302715</b>     | 2.40                           | 1.15E-23 | 3.60E-18 | No                                     | No                   | -              |
| <b>chr10:104593626-104593861</b> | 1.5299391                      | 3.53E-10 | 0.000074 | No                                     | Yes                  | <i>CYP17A1</i> |

**Supplementary Table 12.** Top significant genomic windows for H3K9 tri-methylation ChIP-seq of dCas9-KRAB +Cr4 compared to dCas9 + Cr4. Cr4 protospacer sequence is located at chr11:5302033-5302052. \* indicates that genomic window contains the full Cr4 target sequence.

| Location                   | log <sub>2</sub> (Fold Change) | p-value  | FDR      | Contains Seed Sequence 5'CCAGANGG3' | Located within gene? | Gene           |
|----------------------------|--------------------------------|----------|----------|-------------------------------------|----------------------|----------------|
| chr11: 5301862-5302715     | 2.459                          | 9.25E-25 | 5.81E-19 | Yes                                 | No                   | -              |
| chr11: 5299712-5300301     | 2.041                          | 3.46E-22 | 1.09E-16 | No                                  | No                   | -              |
| chr10: 104593626-104593861 | 1.681                          | 5.46E-12 | 1.14E-06 | No                                  | Yes                  | <i>CYP17A1</i> |
| chr8: 15483400-15485560    | -1.005                         | 2.31E-10 | 3.62E-05 | Yes                                 | Yes                  | <i>TUSC3</i>   |
| chr11: 5304696-5305089     | 1.517                          | 3.73E-10 | 4.03E-05 | Yes                                 | No                   | -              |
| chr11: 5305857-5306185     | 1.518                          | 3.85E-10 | 4.03E-05 | No                                  | No                   | -              |
| chr19: 50162440-50164657   | 1.022                          | 8.92E-10 | 8.01E-05 | Yes                                 | Yes                  | <i>IRF3</i>    |
| chr1: 212292343-212293213  | 1.389                          | 5.07E-09 | 3.98E-04 | Yes                                 | Yes                  | <i>DTL</i>     |
| chr15: 63335520-63336583   | 1.195                          | 7.24E-09 | 5.05E-04 | Yes                                 | Yes                  | <i>TPM1</i>    |
| chr17: 25827626-25828098   | -1.160                         | 1.59E-08 | 9.97E-04 | No                                  | No                   | -              |
| chr6: 3090860-3094479      | -0.7661                        | 3.77E-08 | 2.15E-03 | Yes                                 | No                   | -              |
| chr5: 34727454-34728284    | -0.9300                        | 5.96E-08 | 3.10E-03 | Yes                                 | Yes                  | <i>RAI14</i>   |
| chr2: 170612855-170613645  | -1.148                         | 6.42E-08 | 3.10E-03 | Yes                                 | No                   | -              |
| chr11: 76688558-76690234   | -0.9194                        | 7.90E-08 | 3.54E-03 | Yes                                 | Yes                  | <i>ACER3</i>   |
| chr14: 73674302-73676117   | -0.9017                        | 9.45E-08 | 3.96E-03 | Yes                                 | Yes                  | <i>PSEN1</i>   |
| chr3: 195999724-196001313  | -0.9045                        | 1.25E-07 | 4.92E-03 | Yes                                 | Yes                  | <i>PCYT1A</i>  |
| chr1: 155660498-155661143  | -0.9290                        | 1.41E-07 | 5.21E-03 | Yes                                 | Yes                  | <i>DAP3</i>    |
| chr5: 171350838-171352308  | -0.9185                        | 1.54E-07 | 5.36E-03 | Yes                                 | Yes                  | <i>FBXW11</i>  |
| chr6: 126273775-126275090  | -0.9191                        | 1.81E-07 | 5.97E-03 | No                                  | No                   | -              |
| chr19:10409016-10410198    | -0.9645                        | 2.16E-07 | 6.60E-03 | No                                  | No                   | -              |
| chr15: 78595790-78597261   | -0.9210                        | 2.21E-07 | 6.60E-03 | Yes                                 | No                   | -              |
| chr9: 140440257-140441548  | -0.8757                        | 2.44E-07 | 6.98E-03 | No                                  | Yes                  | <i>PNPLA7</i>  |
| chr1: 16295182-16296434    | -0.8780                        | 2.67E-07 | 7.30E-03 | No                                  | Yes                  | <i>ZBTB17</i>  |
| chr4: 83301473-83302766    | -0.8206                        | 3.24E-07 | 8.47E-03 | Yes                                 | No                   | -              |
| chr10:72381898-72383107    | -0.9214                        | 4.30E-07 | 1.08E-02 | No                                  | No                   | -              |

**Supplementary Table 13.** Top significant genomic windows for H3K9 tri-methylation ChIP-seq of dCas9-KRAB + Cr10 compared to dCas9 + Cr10. Cr10 protospacer sequence is located at chr11:5301800-5301819.

| Location               | log2(Fold Change) | p-value  | FDR      | Contains seed sequence: 5' GTCTCNGG 3' | Located within gene? | Gene |
|------------------------|-------------------|----------|----------|----------------------------------------|----------------------|------|
| chr11: 5299712-5300301 | 2.55              | 1.34E-32 | 8.45E-27 | No                                     | No                   | -    |
| chr11: 5301862-5302715 | 2.42              | 5.42E-24 | 1.70E-18 | No                                     | No                   | -    |

**Supplementary Table 14.** Top 20 significant genomic windows by p-value for DNase-seq of dCas9-KRAB + Cr4 compared to dCas9-KRAB without sgRNA. Cr4 protospacer sequence is located at chr11:5302033-5302052. \* indicates that genomic window contains the full Cr4 target sequence.

| Location                   | log <sub>2</sub> (Fold Change) | p-value  | FDR      | Contains seed sequence: 5' CCAGANGG 3' | Located within gene? | Gene           |
|----------------------------|--------------------------------|----------|----------|----------------------------------------|----------------------|----------------|
| chr11: 5305806-5306106     | -0.79                          | 2.37E-07 | 1.48E-02 | Yes                                    | No                   | -              |
| chr11: 5305943-5306243     | -0.76                          | 5.69E-07 | 1.78E-02 | Yes                                    | No                   | -              |
| chr11: 5301772-5302072*    | -0.71                          | 4.33E-06 | 9.04E-02 | Yes                                    | No                   | -              |
| chr11: 5275809-5276109     | -0.68                          | 8.52E-06 | 1.33E-01 | No                                     | No                   | -              |
| chr11: 5276005-5276305     | -0.60                          | 6.19E-05 | 7.75E-01 | No                                     | No                   | -              |
| chr11: 5301930-5302230*    | -0.60                          | 1.57E-04 | 1.00E+00 | Yes                                    | No                   | -              |
| chr11: 5271045-5271345     | -0.54                          | 3.08E-04 | 1.00E+00 | Yes                                    | No                   | -              |
| chr11: 5270905-5271205     | -0.55                          | 3.15E-04 | 1.00E+00 | No                                     | No                   | -              |
| chr15: 68132343-68132643   | 0.49                           | 8.00E-04 | 1.00E+00 | No                                     | No                   | -              |
| chr12: 125399026-125399326 | 0.48                           | 8.79E-04 | 1.00E+00 | Yes                                    | Yes                  | <i>UBC</i>     |
| chr5: 64558528-64558828    | -0.53                          | 9.47E-04 | NA       | No                                     | Yes                  | <i>ADAMTS6</i> |
| chr9: 77735162-77735463    | 0.51                           | 1.03E-03 | NA       | No                                     | Yes                  | <i>OSTF1</i>   |
| chr1: 145437591-145437891  | 0.51                           | 1.58E-03 | NA       | No                                     | Yes                  | <i>NBPF10</i>  |
| chr5: 64558418-64558718    | -0.48                          | 2.73E-03 | NA       | No                                     | Yes                  | <i>ADAMTS6</i> |
| chr18: 27967477-27967777   | -0.46                          | 3.03E-03 | NA       | No                                     | No                   | -              |
| chr7: 3038570-3038871      | 0.39                           | 3.80E-03 | NA       | No                                     | Yes                  | <i>CARD11</i>  |
| chr1: 218477714-218478014  | -0.46                          | 4.28E-03 | NA       | No                                     | Yes                  | <i>RRP15</i>   |
| chr12: 132933359-132933659 | 0.46                           | 4.54E-03 | NA       | Yes                                    | No                   | -              |
| chrX: 119115698-119115998  | -0.46                          | 4.62E-03 | NA       | No                                     | No                   | -              |
| chr5: 148186052-148186352  | -0.44                          | 4.79E-03 | 1.00E+00 | Yes                                    | No                   | -              |

**Supplementary Table 15.** Top 20 significant genomic windows by p-value for DNase-seq of dCas9-KRAB + Cr10 compared to dCas9-KRAB without sgRNA. Cr10 protospacer sequence is located at chr11:5301800-5301819. \* indicates that genomic window contains the full Cr10 target sequence.

| Location                   | log2(Fold Change) | p-value  | FDR      | Contains seed sequence 5' GTCTCNGG 3' | Located within gene? | Gene           |
|----------------------------|-------------------|----------|----------|---------------------------------------|----------------------|----------------|
| chr11: 5301930-5302230     | -0.96             | 3.37E-10 | 5.06E-05 | No                                    | No                   | -              |
| chr11: 5301764-5302064*    | -0.85             | 3.52E-08 | 2.64E-03 | Yes                                   | No                   | -              |
| chr12: 125399122-125399422 | 0.48              | 5.23E-04 | 1.00E+00 | No                                    | Yes                  | <i>UBC</i>     |
| chr11: 5305806-5306106     | -0.52             | 6.42E-04 | 1.00E+00 | No                                    | No                   | -              |
| chr12: 133727528-133727829 | 0.50              | 7.07E-04 | 1.00E+00 | No                                    | Yes                  | <i>ZNF268</i>  |
| chr11: 5305943-5306243     | -0.50             | 1.08E-03 | 1.00E+00 | No                                    | No                   | -              |
| chr15: 68132314-68132614   | 0.50              | 1.34E-03 | 1.00E+00 | No                                    | No                   | -              |
| chr12: 125398922-125399222 | 0.43              | 1.98E-03 | 1.00E+00 | No                                    | Yes                  | <i>UBC</i>     |
| chr21: 40959332-40959633   | 0.44              | 2.37E-03 | 1.00E+00 | No                                    | No                   | -              |
| chr19: 9846791-9847091     | 0.46              | 2.61E-03 | 1.00E+00 | No                                    | No                   | -              |
| chr1: 15666787-15667087    | 0.45              | 3.24E-03 | 1.00E+00 | No                                    | Yes                  | <i>FHAD1</i>   |
| chr11: 5275809-5276109     | -0.44             | 3.63E-03 | 1.00E+00 | No                                    | Yes                  | <i>HBG2</i>    |
| chr19: 9846695-9846995     | 0.44              | 4.50E-03 | 1.00E+00 | No                                    | No                   | -              |
| chr6: 151162841-151163141  | -0.40             | 4.77E-03 | 1.00E+00 | No                                    | Yes                  | <i>PLEKHG1</i> |
| chr11: 5279828-5280129     | -0.44             | 5.03E-03 | 1.00E+00 | No                                    | Yes                  | <i>HBG2</i>    |
| chr19: 58873265-58873565   | 0.43              | 5.58E-03 | 1.00E+00 | No                                    | Yes                  | <i>ZNF497</i>  |
| chr18: 60125997-60126297   | 0.33              | 6.78E-03 | 1.00E+00 | No                                    | Yes                  | <i>ZCCHC2</i>  |
| chr1: 1830655-1830955      | 0.41              | 7.27E-03 | 1.00E+00 | No                                    | Yes                  | <i>GNB1</i>    |
| chr8: 102075041-102075341  | -0.38             | 7.48E-03 | 1.00E+00 | No                                    | Yes                  | <i>YWHAZ</i>   |
| chr2: 197188902-197189202  | -0.37             | 7.67E-03 | 1.00E+00 | No                                    | Yes                  | <i>HECW2</i>   |

**Supplementary Table 16.** Primer sequences used for qPCR

| <b>Target</b>                   | <b>Primer</b>             |
|---------------------------------|---------------------------|
| qPCR <i>GAPDH</i> Fwd           | CAATGACCCCTTCATTGACC      |
| qPCR <i>GAPDH</i> Rev           | TTGATTTTGGAGGGATCTCG      |
| qPCR <i>HBE1</i> Fwd            | TCACTAGCAAGCTCTCAGGC      |
| qPCR <i>HBE1</i> Rev            | AACAACGAGGAGTCTGCCC       |
| qPCR <i>HBG1/2</i> Fwd          | GCTGAGTGAAGTCACTGTGA      |
| qPCR <i>HBG1/2</i> Rev          | GAATTCTTTGCCGAAATGGA      |
| qPCR <i>HBB</i> Fwd             | GCACGTGGATCCTGAGAACT      |
| qPCR <i>HBB</i> Rev             | ATTGGACAGCAAGAAAGCGAG     |
| ChIP-qPCR <i>GAPDH</i> Fwd      | ACAGTCCAGTCCTGGGAACC      |
| ChIP-qPCR <i>GAPDH</i> Rev      | CAGCCGCCTGGTTCAACTG       |
| ChIP-qPCR HS2 <i>GATA-2</i> Fwd | CTGGCTCAAGCACAGCAATG      |
| ChIP-qPCR HS2 <i>GATA-2</i> Rev | GTCAGGTGGTCAGCTTCTCC      |
| ChIP-qPCR HS2 <i>FOSL-1</i> Fwd | CCCATAGTCCAAGCATGAGCAGTTC |
| ChIP-qPCR HS2 <i>FOSL-1</i> Rev | CTCTAGGCTGAGAACATCTGGGCAC |
